# Supplementary material for: Implication of the APP Gene in Intellectual Abilities
Source: PubMed Central journal article supplement — J Alzheimers Dis. 2017 Jul 17;59(2):723–35. doi: 10.3233/JAD-170049 (PMC5523840; doi:10.3233/jad-170049), 2017-07-17
Supplement: jad-59-jad170049-s002.pdf [file jad-59-jad170049-s002.pdf]

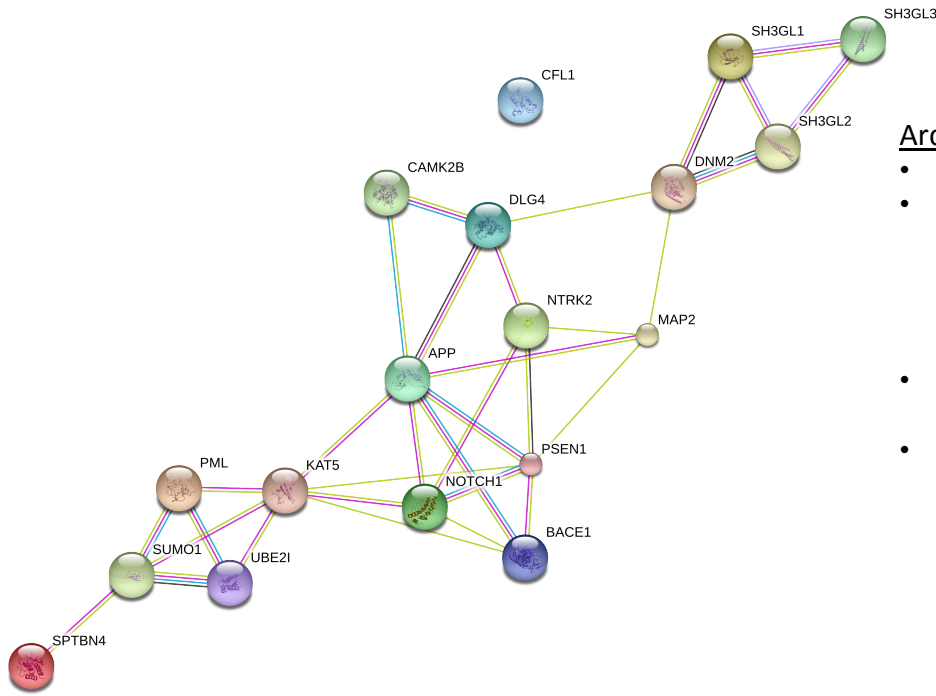

### Arc function

- protein-protein interaction enrichment p-value: 1.52E-09
- enriched biological processes (GO), FDR<1.00E-04
  - GO:0048666 neuron development, FDR=3.42E-05
  - GO:0048812 neuron projection morphogenesis, FDR=3.42E-05
  - GO:0030182 neuron differentiation, FDR=7.56E-05
  - GO:0031175 neuron projection development, FDR=7.56E-05
- enriched molecular functions (GO), FDR<1.00E-04
  - GO:0005515 protein binding, FDR=1.62E-07
- enriched cellular components (GO), FDR<1.00E-05
  - GO:0042995 cell projection, FDR=2.25E-08
  - GO:0097458 neuron part, FDR=9.02E-08
  - GO:0043005 neuron projection, FDR=1.47E-07
  - GO:0036477 somatodendritic compartment, FDR=5.40E-06
  - GO:0045202 synapse, FDR=5.70E-06
  - GO:0031090 organelle membrane, FDR=6.26E-06
  - GO:0030425 dendrite; FDR=7.59E-06

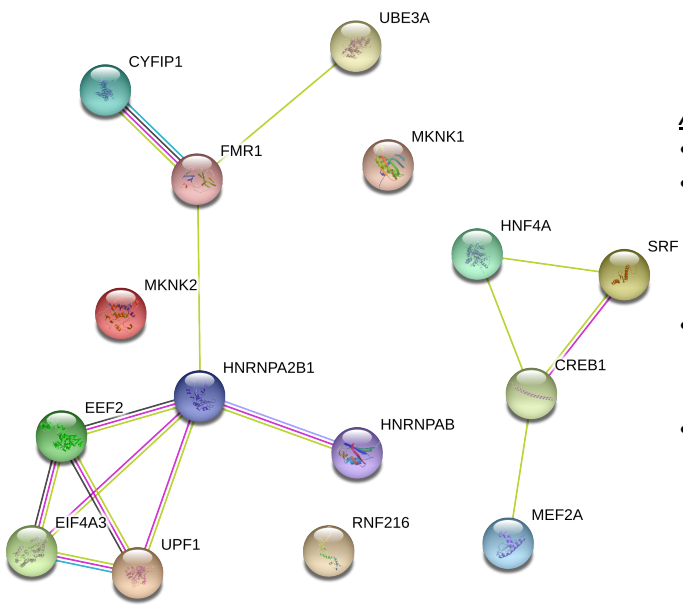

### ARC expression

- protein-protein interaction enrichment p-value: 3.19E-04
- enriched biological processes (GO), FDR<1.00E-03
  - GO:0006417 regulation of translation, FDR=2.25E-04
  - GO:2000112 regulation of cellular macromolecule biosynthetic process, FDR=2.92E-04
  - GO:0051171 regulation of nitrogen compound metabolic process, FDR=4.20E-04
- enriched molecular functions (GO), FDR<0.01
  - GO:0003705 transcription factor activity, RNA polymerase II distal enhancer sequence-specific binding, FDR=0.002
- enriched cellular components (GO), FDR<1.00E-03
  - GO:0005654 nucleoplasm, FDR=2.52E-04
  - GO:0005634 nucleus, FDR=5.51E-04
