# Supplementary figures and images for: Implication of the APP Gene in Intellectual Abilities
Source: PubMed Central journal article supplement — J Alzheimers Dis. 2017 Jul 17;59(2):723–35. doi: 10.3233/JAD-170049 (PMC5523840; doi:10.3233/jad-170049), 2017-07-17

**A**

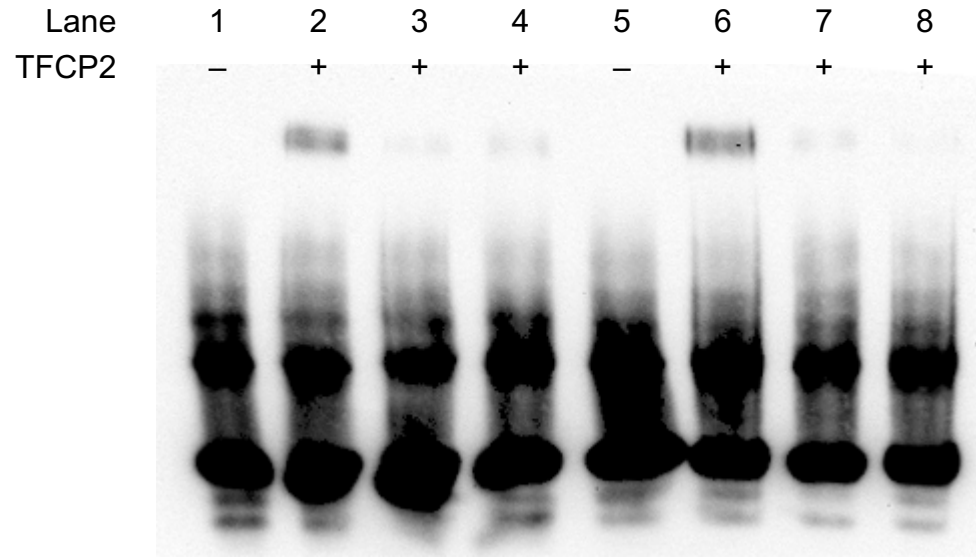

| Labelled probe | rs2830077[A] |   |      |      | rs2830077[C] |   |      |      |
|----------------|--------------|---|------|------|--------------|---|------|------|
| rs2830077[A]   | -            | - | 100x | -    | -            | - | -    | 100x |
| rs2830077[C]   | -            | - | -    | 100x | -            | - | 100x | -    |

**B**

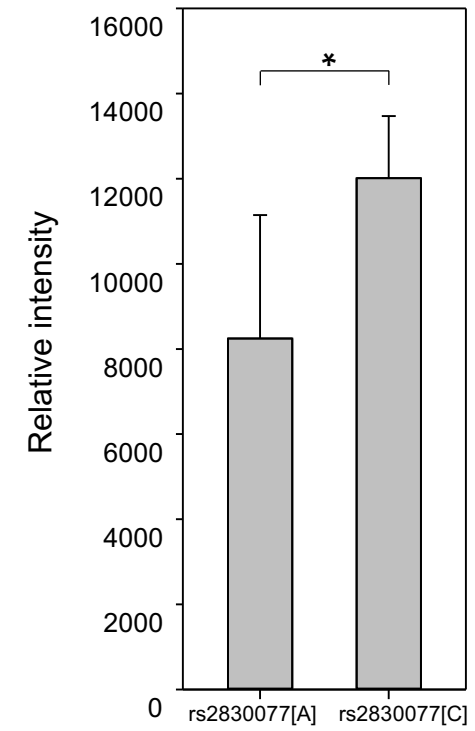

Supplement: jad-59-jad170049-s006.pdf [file jad-59-jad170049-s006.pdf]
